# Supplementary material
Source: PubMed Central journal article supplement (PMC8445183)
Supplement: iai.00307-21-s0001.pdf [file iai.00307-21-s0001.pdf]

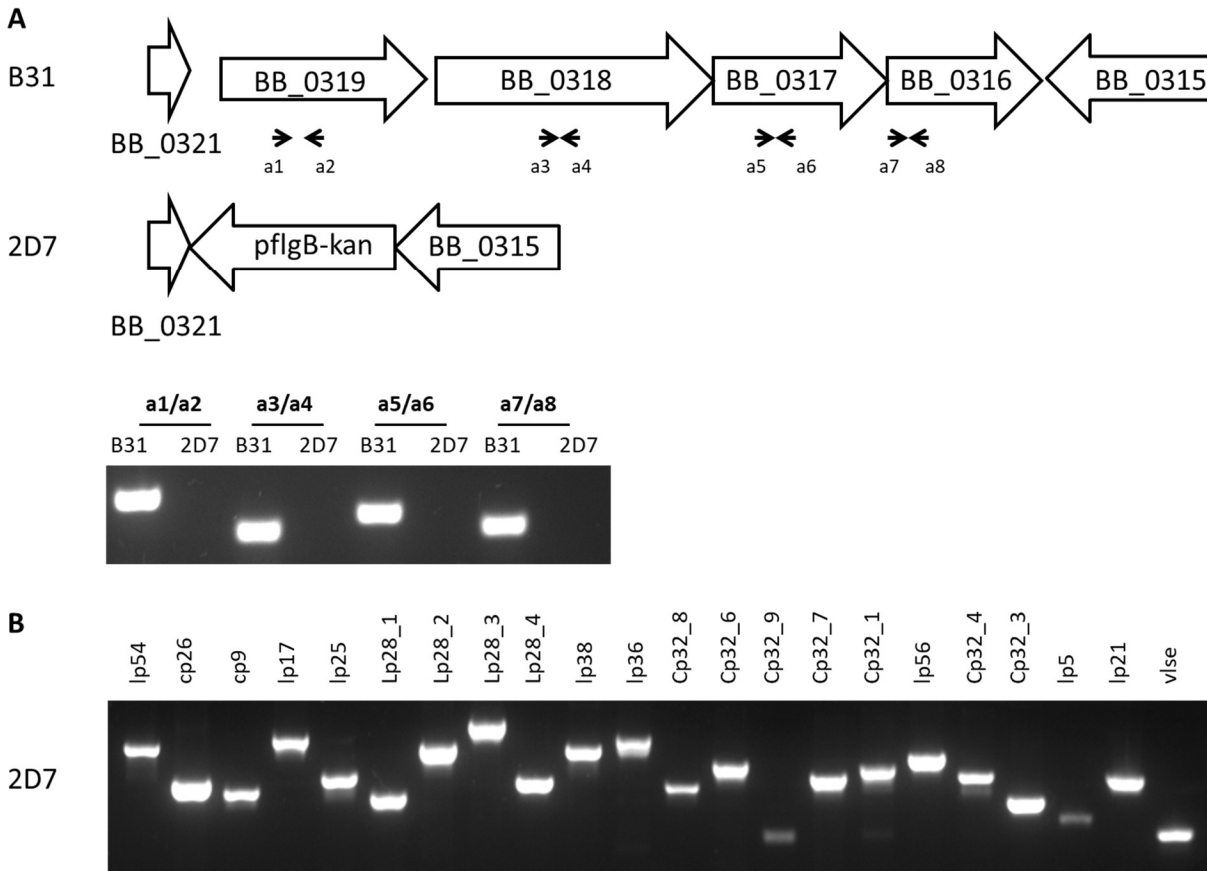

**Supplemental Fig. 1. (A)** Schematic representation of the *rfuABCD* operon in wildtype (B31) and the deletion mutant (2D7). Small arrows indicate the approximate positions of the primers used for diagnostic PCR. Gel image shows PCR products confirming that the 2D7 mutant lacks each of the four genes. **(B)** PCR confirmation that the 2D7 mutant maintains all known virulence-associated plasmids as well as the *vlsE* gene (essential for murine pathogenicity). The designations of the plasmids/genes are shown above the PCR products.
